# Supplementary material for: Evidence of Energy Metabolism Alterations in Cultured Neonatal Astrocytes Derived from the Ts65Dn Mouse Model of Down Syndrome
Source: MDPI journal article supplement (doi:10.3390/brainsci12010083), 2022-01-06
Supplement: s1 [file s1]

# Evidence of energy metabolism alterations in cultured neonatal astrocytes derived from the Ts65Dn mouse model of Down syndrome

Bruna L. Zampieri and Alberto C. S. Costa

## Supplementary Materials

### Raw Data and Output from Statistical Software

#### Data in Figure 2b (Data Analysis done with GraphPad Prism)

| Basal OCR |        | Non-mito OCR |        | Proton Leak |        | ATP Production |        | Maximal OCR |        | Spare Capacity |        | Coupling Efficiency |        |
|-----------|--------|--------------|--------|-------------|--------|----------------|--------|-------------|--------|----------------|--------|---------------------|--------|
| WT        | Ts65Dn | WT           | Ts65Dn | WT          | Ts65Dn | WT             | Ts65Dn | WT          | Ts65Dn | WT             | Ts65Dn | WT                  | Ts65Dn |
| 115.93    | 213.94 | 31.2         | 57.5   | 19.44       | 32.89  | 96.49          | 181.05 | 258.46      | 385.1  | 142.54         | 171.16 | 83.23               | 84.64  |
| 63.35     | 197.29 | 21.91        | 59.83  | 10.65       | 34.2   | 52.7           | 163.09 | 135.76      | 511.76 | 72.41          | 314.46 | 83.18               | 82.56  |
| 60.47     | 210.49 | 20.83        | 53.11  | 13.75       | 37.86  | 46.72          | 172.63 | 126.78      | 454.36 | 66.31          | 243.87 | 77.24               | 82.01  |
| 74.17     | 82.18  | 22.89        | 30.35  | 17.47       | 15.37  | 56.7           | 66.81  | 147.8       | 212.95 | 73.63          | 130.77 | 76.33               | 81.3   |
| 62.38     | 120.57 | 22.32        | 35.25  | 14.27       | 24.09  | 48.11          | 96.48  | 128.75      | 304.73 | 66.37          | 184.16 | 77.12               | 80.04  |
| 132.24    | 99.67  | 44.25        | 28.91  | 14.83       | 23.75  | 117.41         | 75.92  | 250.09      | 245.71 | 117.84         | 146.04 | 88.82               | 76.17  |
| 74.02     | 95.71  | 24.56        | 28.39  | 16.83       | 19.48  | 56.05          | 76.23  | 132.37      | 241.06 | 59.49          | 145.35 | 76.9                | 79.64  |
| 54.65     | 133.44 | 23.51        | 33.72  | 17.24       | 21.14  | 37.99          | 112.3  | 99.1        | 229.57 | 43.87          | 96.13  | 68.77               | 84.15  |
| 47.07     | 111.45 | 21.33        | 29.09  | 11.1        | 19.47  | 36.7           | 91.99  | 84.63       | 199.91 | 36.83          | 88.46  | 76.93               | 82.39  |
| 65.55     | 101.19 | 24.13        | 27.68  | 16.78       | 21.71  | 47.97          | 76.96  | 152.11      | 128.88 | 87.37          | 30.21  | 74.1                | 77.99  |
|           | 73.33  |              | 21.19  |             | 14.54  |                | 56.78  |             | 165.28 |                | 93.95  |                     | 79.62  |
|           | 60.14  |              | 20.69  |             | 13.24  |                | 45.96  |             | 139.42 |                | 80.22  |                     | 77.67  |
|           | 92.79  |              | 28.11  |             | 18.83  |                | 72.98  |             | 157.49 |                | 65.68  |                     | 79.49  |

#### Basal OCR

|                                         | WT               | Ts65Dn |
|-----------------------------------------|------------------|--------|
| D'Agostino & Pearson normality test     |                  |        |
| K2                                      | 5.596            | 2.514  |
| P value                                 | 0.0609           | 0.2845 |
| Passed normality test (alpha=0.05)?     | Yes              | Yes    |
| Table Analyzed                          | Basal OCR        |        |
| Column B                                | Ts65Dn postnatal |        |
| vs.                                     | vs.              |        |
| Column A                                | WT postnatal     |        |
| Unpaired t test with Welch's correction |                  |        |
| P value                                 | 0.0109           |        |
| P value summary                         | *                |        |
| Significantly different (P < 0.05)?     | Yes              |        |
| One- or two-tailed P value?             | Two-tailed       |        |
| Welch-corrected t, df                   | t=2.823 df=18.93 |        |

#### Non-mito OCR

|                                     | WT                                   | Ts65Dn |
|-------------------------------------|--------------------------------------|--------|
| D'Agostino & Pearson normality test |                                      |        |
| K2                                  | 17.56                                | 3.307  |
| P value                             | 0.0002                               | 0.1914 |
| Passed normality test (alpha=0.05)? | No                                   | Yes    |
| P value summary                     | ***                                  | ns     |
| Table Analyzed                      | Non-mitochondrial Oxygen Consumption |        |
| Column B                            | Ts65Dn postnatal                     |        |
| vs.                                 | vs.                                  |        |

|                                     |              |
|-------------------------------------|--------------|
| Column A                            | WT postnatal |
| Mann Whitney test                   |              |
| P value                             | 0.0493       |
| Exact or approximate P value?       | Exact        |
| P value summary                     | *            |
| Significantly different (P < 0.05)? | Yes          |
| One- or two-tailed P value?         | Two-tailed   |
| Sum of ranks in column A,B          | 88 , 188     |
| Mann-Whitney U                      | 33           |

## Proton Leak

|                                         |                  |                  |
|-----------------------------------------|------------------|------------------|
|                                         | WT               | Ts65Dn           |
| D'Agostino & Pearson normality test     |                  |                  |
| K2                                      | 0.5635           | 1.898            |
| P value                                 | 0.7545           | 0.3872           |
| Passed normality test (alpha=0.05)?     | Yes              | Yes              |
| P value summary                         | ns               | ns               |
| Table Analyzed                          | Proton Leak      |                  |
| Column B                                | Ts65Dn postnatal |                  |
| vs.                                     | vs.              |                  |
| Column A                                | WT postnatal     |                  |
| Unpaired t test with Welch's correction |                  |                  |
| P value                                 |                  | 0.0050           |
| P value summary                         |                  | **               |
| Significantly different (P < 0.05)?     |                  | Yes              |
| One- or two-tailed P value?             |                  | Two-tailed       |
| Welch-corrected t, df                   |                  | t=3.257 df=15.95 |

## ATP Production

|                                     |                  |        |
|-------------------------------------|------------------|--------|
|                                     | WT               | Ts65Dn |
| D'Agostino & Pearson normality test |                  |        |
| K2                                  | 7.302            | 2.536  |
| P value                             | 0.0260           | 0.2813 |
| Passed normality test (alpha=0.05)? | No               | Yes    |
| P value summary                     | *                | ns     |
| Table Analyzed                      | ATP Production   |        |
| Column B                            | Ts65Dn postnatal |        |
| vs.                                 | vs.              |        |
| Column A                            | WT postnatal     |        |
| Mann Whitney test                   |                  |        |
| P value                             | 0.0121           |        |
| Exact or approximate P value?       | Exact            |        |
| P value summary                     | *                |        |
| Significantly different (P < 0.05)? | Yes              |        |
| One- or two-tailed P value?         | Two-tailed       |        |
| Sum of ranks in column A,B          | 80 , 196         |        |
| Mann-Whitney U                      | 25               |        |

## Maximal OCR

|                                         |                  |                  |
|-----------------------------------------|------------------|------------------|
|                                         | WT               | Ts65Dn           |
| D'Agostino & Pearson normality test     |                  |                  |
| K2                                      | 3.515            | 3.047            |
| P value                                 | 0.1724           | 0.2179           |
| Passed normality test (alpha=0.05)?     | Yes              | Yes              |
| P value summary                         | ns               | ns               |
| Table Analyzed                          | Maximal OCR      |                  |
| Column B                                | Ts65Dn postnatal |                  |
| vs.                                     | vs.              |                  |
| Column A                                | WT postnatal     |                  |
| Unpaired t test with Welch's correction |                  |                  |
| P value                                 |                  | 0.0114           |
| P value summary                         |                  | *                |
| Significantly different (P < 0.05)?     |                  | Yes              |
| One- or two-tailed P value?             |                  | Two-tailed       |
| Welch-corrected t, df                   |                  | t=2.819 df=18.03 |

## Spare Capacity

D'Agostino & Pearson normality test

K2

P value

Passed normality test (alpha=0.05)?

P value summary

Table Analyzed

Column B

vs.

Column A

Unpaired t test with Welch's correction

P value

P value summary

Significantly different (P < 0.05)?

One- or two-tailed P value?

Welch-corrected t, df

WT

Ts65Dn

2.947

3.69

0.2291

0.1581

Yes

Yes

ns

ns

Spare Capacity

Ts65Dn postnatal

vs.

WT postnatal

0.0201

\*

Yes

Two-tailed

t=2.567 df=16.86

## Coupling Efficiency

D'Agostino & Pearson normality test

K2

P value

Passed normality test (alpha=0.05)?

P value summary

Table Analyzed

Column B

vs.

Column A

Unpaired t test with Welch's correction

P value

P value summary

Significantly different (P < 0.05)?

One- or two-tailed P value?

Welch-corrected t, df

WT

Ts65Dn

0.8569

0.2618

0.6515

0.8773

Yes

Yes

ns

ns

Coupling Efficiency

Ts65Dn postnatal

vs.

WT postnatal

0.2421

ns

No

Two-tailed

t=1.231 df=11.88

## Data expressed as % of baseline values (Analysis done with GraphPad Prism)

| non-mito OCR<br>(% baseline) |          | Maximal OCR<br>(% baseline) |          | Proton Leak<br>(% baseline) |          | ATP<br>Production<br>(% baseline) |          | Spare OCR<br>(% baseline) |        |
|------------------------------|----------|-----------------------------|----------|-----------------------------|----------|-----------------------------------|----------|---------------------------|--------|
| WT                           | Ts65Dn   | WT                          | Ts65Dn   | WT                          | Ts65Dn   | WT                                | Ts65Dn   | WT                        | Ts65Dn |
| 26.9131                      | 26.87772 | 222.9553                    | 180.0022 | 16.76691                    | 15.37445 | 83.23309                          | 84.62555 | 222.7                     | 179.94 |
| 34.5924                      | 30.3227  | 214.3007                    | 259.3862 | 16.80641                    | 17.33562 | 83.19359                          | 82.66439 | 214.32                    | 260.58 |
| 34.45479                     | 25.23355 | 209.6504                    | 215.8588 | 22.74027                    | 17.98597 | 77.25974                          | 82.01404 | 209.49                    | 215.47 |
| 30.86645                     | 36.92455 | 199.282                     | 259.1219 | 23.55037                    | 18.7034  | 76.44963                          | 81.29659 | 199.3                     | 259.11 |
| 35.7722                      | 29.23418 | 206.3868                    | 252.7338 | 22.87955                    | 19.98119 | 77.12046                          | 80.01881 | 206.45                    | 252.74 |
| 33.46315                     | 29.00927 | 189.1123                    | 246.529  | 11.21575                    | 23.82736 | 88.78425                          | 76.17264 | 189.53                    | 246.52 |
| 33.17363                     | 29.6596  | 178.8305                    | 251.86   | 22.73438                    | 20.35589 | 75.72126                          | 79.64412 | 181.62                    | 251.89 |
| 43.02762                     | 25.26908 | 181.3385                    | 172.0419 | 31.54966                    | 15.84333 | 69.51266                          | 84.15668 | 178.12                    | 172.84 |
| 45.31118                     | 26.10456 | 179.8102                    | 179.3721 | 23.59041                    | 17.46621 | 77.96622                          | 82.53379 | 173.37                    | 180.44 |
| 36.81379                     | 27.35376 | 232.0611                    | 127.3593 | 25.5928                     | 21.45228 | 73.17887                          | 76.05142 | 234.95                    | 130.66 |
|                              | 28.89264 |                             | 225.3829 |                             | 19.83005 |                                   | 77.43182 |                           | 231.77 |
|                              | 34.40977 |                             | 231.8404 |                             | 22.02143 |                                   | 76.41978 |                           | 235.46 |
|                              | 30.29446 |                             | 169.7263 |                             | 20.29748 |                                   | 78.65015 |                           | 172.09 |

## Non-mito OCR (% baseline)

D'Agostino & Pearson normality test

K2

P value

Passed normality test (alpha=0.05)?

P value summary

Table Analyzed

Column B

vs.

WT

Ts65Dn

1.082

4.191

0.5823

0.1230

Yes

Yes

ns

ns

% Non-mitochondrial Oxygen

Consumption

Ts65Dn postnatal

vs.

|                                         |                  |
|-----------------------------------------|------------------|
| Column A                                | WT postnatal     |
| Unpaired t test with Welch's correction |                  |
| P value                                 | 0.0062           |
| P value summary                         | **               |
| Significantly different (P < 0.05)?     | Yes              |
| One- or two-tailed P value?             | Two-tailed       |
| Welch-corrected t, df                   | t=3.203 df=14.36 |

### Maximal OCR (% baseline)

|                                         |                       |                   |
|-----------------------------------------|-----------------------|-------------------|
|                                         | WT                    | Ts65Dn            |
| D'Agostino & Pearson normality test     |                       |                   |
| K2                                      | 1.173                 | 1.414             |
| P value                                 | 0.5561                | 0.4930            |
| Passed normality test (alpha=0.05)?     | Yes                   | Yes               |
| P value summary                         | ns                    | ns                |
| Table Analyzed                          | % Maximal respiration |                   |
| Column B                                | Ts65Dn postnatal      |                   |
| vs.                                     | vs.                   |                   |
| Column A                                | WT postnatal          |                   |
| Unpaired t test with Welch's correction |                       |                   |
| P value                                 |                       | 0.3877            |
| P value summary                         |                       | ns                |
| Significantly different (P < 0.05)?     |                       | No                |
| One- or two-tailed P value?             |                       | Two-tailed        |
| Welch-corrected t, df                   |                       | t=0.8861 df=17.32 |

### Proton Leak (% baseline)

|                                         |                  |                  |
|-----------------------------------------|------------------|------------------|
|                                         | WT               | Ts65Dn           |
| D'Agostino & Pearson normality test     |                  |                  |
| K2                                      | 0.8223           | 0.07771          |
| P value                                 | 0.6629           | 0.9619           |
| Passed normality test (alpha=0.05)?     | Yes              | Yes              |
| P value summary                         | ns               | ns               |
| Table Analyzed                          | % Proton Leak    |                  |
| Column B                                | Ts65Dn postnatal |                  |
| vs.                                     | vs.              |                  |
| Column A                                | WT postnatal     |                  |
| Unpaired t test with Welch's correction |                  |                  |
| P value                                 |                  | 0.2161           |
| P value summary                         |                  | ns               |
| Significantly different (P < 0.05)?     |                  | No               |
| One- or two-tailed P value?             |                  | Two-tailed       |
| Welch-corrected t, df                   |                  | t=1.308 df=11.67 |

### ATP Production (% baseline)

|                                         |                  |                  |
|-----------------------------------------|------------------|------------------|
|                                         | WT               | Ts65Dn           |
| D'Agostino & Pearson normality test     |                  |                  |
| K2                                      | 0.7861           | 2.365            |
| P value                                 | 0.6750           | 0.3064           |
| Passed normality test (alpha=0.05)?     | Yes              | Yes              |
| P value summary                         | ns               | ns               |
| Table Analyzed                          | % ATP Production |                  |
| Column B                                | Ts65Dn postnatal |                  |
| vs.                                     | vs.              |                  |
| Column A                                | WT postnatal     |                  |
| Unpaired t test with Welch's correction |                  |                  |
| P value                                 |                  | 0.3473           |
| P value summary                         |                  | ns               |
| Significantly different (P < 0.05)?     |                  | No               |
| One- or two-tailed P value?             |                  | Two-tailed       |
| Welch-corrected t, df                   |                  | t=0.9748 df=13.1 |

### Spare OCR (% baseline)

|                                     |        |        |
|-------------------------------------|--------|--------|
|                                     | WT     | Ts65Dn |
| D'Agostino & Pearson normality test |        |        |
| K2                                  | 0.5981 | 1.597  |
| P value                             | 0.7415 | 0.4501 |

|                                         |                                   |     |
|-----------------------------------------|-----------------------------------|-----|
| Passed normality test (alpha=0.05)?     | Yes                               | Yes |
| P value summary                         | ns                                | ns  |
| Table Analyzed                          | Spare Respiratory Capacity as a % |     |
| Column B                                | Ts65Dn postnatal                  |     |
| vs.                                     | vs.                               |     |
| Column A                                | WT postnatal                      |     |
| Unpaired t test with Welch's correction |                                   |     |
| P value                                 | 0.3243                            |     |
| P value summary                         | ns                                |     |
| Significantly different (P < 0.05)?     | No                                |     |
| One- or two-tailed P value?             | Two-tailed                        |     |
| Welch-corrected t, df                   | t=1.013 df=18.05                  |     |

**Figure 3b (Data Analysis done with Statistica)**

| C:\Users\Bruna\Desktop\Brain Sciences\Resultados para anova_nov21.xlsx : Pup-adult |          |       |            |
|------------------------------------------------------------------------------------|----------|-------|------------|
|                                                                                    | Genotype | Basal | Oligomycin |
| 1                                                                                  | WT       | 68.27 | 98.14      |
| 2                                                                                  | WT       | 21.90 | 37.36      |
| 3                                                                                  | WT       | 22.73 | 51.94      |
| 4                                                                                  | WT       | 22.15 | 38.62      |
| 5                                                                                  | WT       | 33.64 | 54.42      |
| 6                                                                                  | WT       | 27.49 | 56.74      |
| 7                                                                                  | WT       | 27.30 | 58.32      |
| 8                                                                                  | WT       | 30.04 | 54.28      |
| 9                                                                                  | WT       | 23.27 | 46.68      |
| 10                                                                                 | WT       | 18.35 | 44.54      |
| 11                                                                                 | Ts65Dn   | 25.98 | 54.75      |
| 12                                                                                 | Ts65Dn   | 96.15 | 165.41     |
| 13                                                                                 | Ts65Dn   | 72.04 | 120.71     |
| 14                                                                                 | Ts65Dn   | 65.46 | 108.13     |
| 15                                                                                 | Ts65Dn   | 36.08 | 69.08      |
| 16                                                                                 | Ts65Dn   | 29.09 | 60.95      |
| 17                                                                                 | Ts65Dn   | 30.15 | 56.00      |
| 18                                                                                 | Ts65Dn   | 18.07 | 37.02      |
| 19                                                                                 | Ts65Dn   | 37.00 | 70.28      |
| 20                                                                                 | Ts65Dn   | 30.92 | 62.04      |
| 21                                                                                 | Ts65Dn   | 28.21 | 66.35      |
| 22                                                                                 | Ts65Dn   | 28.71 | 62.99      |
| 23                                                                                 | Ts65Dn   | 25.49 | 63.93      |

| Effect    | Repeated Measures Analysis of Variance (Stats dez_2021-acc2) Sigma-restricted parameterization Effective hypothesis decomposition |                  |          |          |          |
|-----------|-----------------------------------------------------------------------------------------------------------------------------------|------------------|----------|----------|----------|
|           | SS                                                                                                                                | Degr. of Freedom | MS       | F        | p        |
| Intercept | 113742.3                                                                                                                          | 1                | 113742.3 | 99.3736  | 0.000000 |
| Genotype  | 3149.1                                                                                                                            | 1                | 3149.1   | 2.7513   | 0.112038 |
| Error     | 24036.4                                                                                                                           | 21               | 1144.6   |          |          |
| TREATM    | 10541.3                                                                                                                           | 1                | 10541.3  | 210.3052 | 0.000000 |

|                 |        |    |       |        |          |
|-----------------|--------|----|-------|--------|----------|
| TREATM*Genotype | 399.8  | 1  | 399.8 | 7.9760 | 0.010163 |
| Error           | 1052.6 | 21 | 50.1  |        |          |

|          |                                                                                                                                        |            |               |               |               |               |
|----------|----------------------------------------------------------------------------------------------------------------------------------------|------------|---------------|---------------|---------------|---------------|
| Cell No. | LSD test; variable DV_1 (Stats dez_2021-acc2) Probabilities for Post Hoc Tests Error: Between; Within; Pooled MS = 597.36, df = 22.836 |            |               |               |               |               |
|          | Genotype                                                                                                                               | TREATM     | {1}<br>29.514 | {2}<br>54.104 | {3}<br>40.258 | {4}<br>76.742 |
| 1        | WT                                                                                                                                     | Basal      |               | 0.000000      | 0.306929      | 0.000130      |
| 2        | WT                                                                                                                                     | Oligomycin | 0.000000      |               | 0.191239      | 0.038037      |
| 3        | Ts65Dn                                                                                                                                 | Basal      | 0.306929      | 0.191239      |               | 0.000000      |
| 4        | Ts65Dn                                                                                                                                 | Oligomycin | 0.000130      | 0.038037      | 0.000000      |               |

## Figures 3c-e (Data Analysis done with GraphPad Prism)

### Figure 3c

#### Glycolytic capacity

D'Agostino & Pearson normality test

K2

P value

Passed normality test (alpha=0.05)?

P value summary

Table Analyzed

Column B

vs.

Column A

Mann Whitney test

P value

Exact or approximate P value?

P value summary

Significantly different (P < 0.05)?

One- or two-tailed P value?

Sum of ranks in column A,B

Mann-Whitney U

|                         |            |
|-------------------------|------------|
| 1.301                   | 11         |
| 0.5219                  | 0.0041     |
| Yes                     | No         |
| ns                      | **         |
| Glycolytic capacity pup |            |
| Ts65Dn neonatal         |            |
| vs.                     |            |
| WT neonatal             |            |
|                         | 0.0020     |
|                         | Exact      |
|                         | **         |
|                         | Yes        |
|                         | Two-tailed |
|                         | 72 , 204   |
|                         | 17         |

### Figure 3d

#### Glycolytic reserve

D'Agostino & Pearson normality test

K2

P value

Passed normality test (alpha=0.05)?

P value summary

Table Analyzed

Column B

vs.

Column A

Unpaired t test with Welch's correction

P value

P value summary

Significantly different (P < 0.05)?

One- or two-tailed P value?

Welch-corrected t, df

|                    |                   |
|--------------------|-------------------|
| 0.3955             | 0.5715            |
| 0.8206             | 0.7514            |
| Yes                | Yes               |
| ns                 | ns                |
| Glycolytic reserve |                   |
| Ts65Dn neonatal    |                   |
| vs.                |                   |
| WT neonatal        |                   |
|                    | 0.5225            |
|                    | ns                |
|                    | No                |
|                    | Two-tailed        |
|                    | t=0.6528 df=17.23 |

## Figure 3e

### OCR/ECAR

|                                     |                 |        |
|-------------------------------------|-----------------|--------|
| D'Agostino & Pearson normality test |                 |        |
| K2                                  | 2.797           | 9.367  |
| P value                             | 0.2470          | 0.0092 |
| Passed normality test (alpha=0.05)? | Yes             | No     |
| P value summary                     | ns              | **     |
| Table Analyzed                      | OCR/ECAR        |        |
| Column B                            | Ts65Dn neonatal |        |
| vs.                                 | vs.             |        |
| Column A                            | WT neonatal     |        |
| Mann Whitney test                   |                 |        |
| P value                             | 0.2569          |        |
| Exact or approximate P value?       | Exact           |        |
| P value summary                     | ns              |        |
| Significantly different (P < 0.05)? | No              |        |
| One- or two-tailed P value?         | Two-tailed      |        |
| Sum of ranks in column A,B          | 101 , 175       |        |
| Mann-Whitney U                      | 46              |        |

## Figure 4 (Data Analysis done with Statistica)

### Figure 4b (One-way ANOVA)

|    | Fig4b-BasalOCR-Data |                |
|----|---------------------|----------------|
|    | Genotype-Treatm     | Oxygen Consump |
| 1  | WT-Basal            | 115.93         |
| 2  | WT-Basal            | 63.35          |
| 3  | WT-Basal            | 60.47          |
| 4  | WT-Basal            | 74.17          |
| 5  | WT-Basal            | 62.38          |
| 6  | WT-Basal            | 132.24         |
| 7  | WT-Basal            | 74.02          |
| 8  | WT-Basal            | 54.65          |
| 9  | WT-Basal            | 47.07          |
| 10 | WT-Basal            | 65.55          |
| 11 | TS-Basal            | 213.94         |
| 12 | TS-Basal            | 197.29         |
| 13 | TS-Basal            | 210.49         |
| 14 | TS-Basal            | 82.18          |
| 15 | TS-Basal            | 120.57         |
| 16 | TS-Basal            | 99.67          |
| 17 | TS-Basal            | 95.71          |
| 18 | TS-Basal            | 133.44         |
| 19 | TS-Basal            | 111.45         |
| 20 | TS-Basal            | 101.19         |
| 21 | TS-Basal            | 73.33          |
| 22 | TS-Basal            | 60.14          |
| 23 | TS-Basal            | 92.79          |
| 24 | WT-Glut             | 83.23          |
| 25 | WT-Glut             | 76.41          |
| 26 | WT-Glut             | 191.69         |
| 27 | WT-Glut             | 152.63         |

|    |         |        |
|----|---------|--------|
| 28 | WT-Glut | 78.46  |
| 29 | WT-Glut | 43.87  |
| 30 | WT-Glut | 62.77  |
| 31 | WT-Glut | 48     |
| 32 | WT-Glut | 73.3   |
| 33 | TS-Glut | 164.79 |
| 34 | TS-Glut | 75.1   |
| 35 | TS-Glut | 138    |
| 36 | TS-Glut | 204.97 |
| 37 | TS-Glut | 101.92 |
| 38 | TS-Glut | 88.19  |
| 39 | TS-Glut | 101.19 |
| 40 | TS-Glut | 60.72  |
| 41 | TS-Glut | 90.63  |

| Effect          | Univariate Tests of Significance for Oxygen Consump (Stats dez_2021-Fig4b-BasalOCR)<br>Sigma-restricted parameterization Effective hypothesis decomposition |                  |          |          |          |
|-----------------|-------------------------------------------------------------------------------------------------------------------------------------------------------------|------------------|----------|----------|----------|
|                 | SS                                                                                                                                                          | Degr. of Freedom | MS       | F        | p        |
| Intercept       | 403757.4                                                                                                                                                    | 1                | 403757.4 | 196.4673 | 0.000000 |
| Genotype-Treatm | 15321.0                                                                                                                                                     | 3                | 5107.0   | 2.4850   | 0.075783 |
| Error           | 76038.2                                                                                                                                                     | 37               | 2055.1   |          |          |

|    | Fig4b- Non-MitoOCR -Data |                |
|----|--------------------------|----------------|
|    | Genotype-Treatm          | Oxygen Consump |
| 1  | WT-Basal                 | 31.2           |
| 2  | WT-Basal                 | 21.91          |
| 3  | WT-Basal                 | 20.83          |
| 4  | WT-Basal                 | 22.89          |
| 5  | WT-Basal                 | 22.32          |
| 6  | WT-Basal                 | 44.25          |
| 7  | WT-Basal                 | 24.56          |
| 8  | WT-Basal                 | 23.51          |
| 9  | WT-Basal                 | 21.33          |
| 10 | WT-Basal                 | 24.13          |
| 11 | TS-Basal                 | 57.5           |
| 12 | TS-Basal                 | 59.83          |
| 13 | TS-Basal                 | 53.11          |
| 14 | TS-Basal                 | 30.35          |
| 15 | TS-Basal                 | 35.25          |
| 16 | TS-Basal                 | 28.91          |
| 17 | TS-Basal                 | 28.39          |
| 18 | TS-Basal                 | 33.72          |
| 19 | TS-Basal                 | 29.09          |
| 20 | TS-Basal                 | 27.68          |
| 21 | TS-Basal                 | 21.19          |
| 22 | TS-Basal                 | 20.69          |



|    |          |       |
|----|----------|-------|
| 23 | TS-Basal | 28.11 |
| 24 | WT-Glut  | 32.24 |
| 25 | WT-Glut  | 25.84 |
| 26 | WT-Glut  | 51.46 |
| 27 | WT-Glut  | 49.84 |
| 28 | WT-Glut  | 27.06 |
| 29 | WT-Glut  | 21.05 |
| 30 | WT-Glut  | 23.04 |
| 31 | WT-Glut  | 21.69 |
| 32 | WT-Glut  | 21.57 |
| 33 | TS-Glut  | 63.02 |
| 34 | TS-Glut  | 20.45 |
| 35 | TS-Glut  | 32.26 |
| 36 | TS-Glut  | 55.06 |
| 37 | TS-Glut  | 30.31 |
| 38 | TS-Glut  | 29.03 |
| 39 | TS-Glut  | 28.48 |
| 40 | TS-Glut  | 21.44 |
| 41 | TS-Glut  | 23.06 |

| Effect          | Univariate Tests of Significance for Oxygen Consump (Stats dez_2021-Fig4b-Non-MitoOCR)<br>Sigma-restricted parameterization Effective hypothesis decomposition |                  |          |          |          |
|-----------------|----------------------------------------------------------------------------------------------------------------------------------------------------------------|------------------|----------|----------|----------|
|                 | SS                                                                                                                                                             | Degr. of Freedom | MS       | F        | p        |
| Intercept       | 38959.86                                                                                                                                                       | 1                | 38959.86 | 261.3601 | 0.000000 |
| Genotype-Treatm | 541.15                                                                                                                                                         | 3                | 180.38   | 1.2101   | 0.319602 |
| Error           | 5515.44                                                                                                                                                        | 37               | 149.07   |          |          |

|    | Fig4b- Proton Leak -Data |                |
|----|--------------------------|----------------|
|    | Genotype-Treatm          | Oxygen Consump |
| 1  | WT-Basal                 | 19.44          |
| 2  | WT-Basal                 | 10.65          |
| 3  | WT-Basal                 | 13.75          |
| 4  | WT-Basal                 | 17.47          |
| 5  | WT-Basal                 | 14.27          |
| 6  | WT-Basal                 | 14.83          |
| 7  | WT-Basal                 | 16.83          |
| 8  | WT-Basal                 | 17.24          |
| 9  | WT-Basal                 | 11.1           |
| 10 | WT-Basal                 | 16.78          |
| 11 | TS-Basal                 | 32.89          |
| 12 | TS-Basal                 | 34.2           |
| 13 | TS-Basal                 | 37.86          |
| 14 | TS-Basal                 | 15.37          |
| 15 | TS-Basal                 | 24.09          |
| 16 | TS-Basal                 | 23.75          |
| 17 | TS-Basal                 | 19.48          |

|    |          |       |
|----|----------|-------|
| 18 | TS-Basal | 21.14 |
| 19 | TS-Basal | 19.47 |
| 20 | TS-Basal | 21.71 |
| 21 | TS-Basal | 14.54 |
| 22 | TS-Basal | 13.24 |
| 23 | TS-Basal | 18.83 |
| 24 | WT-Glut  | 16.5  |
| 25 | WT-Glut  | 18.32 |
| 26 | WT-Glut  | 38.85 |
| 27 | WT-Glut  | 28.34 |
| 28 | WT-Glut  | 20.64 |
| 29 | WT-Glut  | 11.39 |
| 30 | WT-Glut  | 17.78 |
| 31 | WT-Glut  | 15.54 |
| 32 | WT-Glut  | 17.85 |
| 33 | TS-Glut  | 27.04 |
| 34 | TS-Glut  | 18.45 |
| 35 | TS-Glut  | 28.08 |
| 36 | TS-Glut  | 37.34 |
| 37 | TS-Glut  | 26.13 |
| 38 | TS-Glut  | 23.01 |
| 39 | TS-Glut  | 26.84 |
| 40 | TS-Glut  | 15.4  |
| 41 | TS-Glut  | 20.28 |

| Effect          | Univariate Tests of Significance for Oxygen Consump (Stats dez_2021-Fig4b-Proton-Leak)<br>Sigma-restricted parameterization Effective hypothesis decomposition |                  |          |          |          |
|-----------------|----------------------------------------------------------------------------------------------------------------------------------------------------------------|------------------|----------|----------|----------|
|                 | SS                                                                                                                                                             | Degr. of Freedom | MS       | F        | p        |
| Intercept       | 17408.57                                                                                                                                                       | 1                | 17408.57 | 387.3278 | 0.000000 |
| Genotype-Treatm | 501.33                                                                                                                                                         | 3                | 167.11   |          | 0.019644 |
| Error           | 1662.98                                                                                                                                                        | 37               | 44.95    |          |          |

| Cell No. | LSD test; variable Oxygen Consump (Stats dez_2021-Fig4b-Proton-Leak) Probabilities for Post Hoc Tests Error: Between MS = 44.945, df = 37.000 |               |               |               |               |
|----------|-----------------------------------------------------------------------------------------------------------------------------------------------|---------------|---------------|---------------|---------------|
|          | Genotype-Treatm                                                                                                                               | {1}<br>15.236 | {2}<br>22.813 | {3}<br>20.579 | {4}<br>24.730 |
| 1        | WT-Basal                                                                                                                                      |               | 0.010737      | 0.091152      | 0.003869      |
| 2        | TS-Basal                                                                                                                                      | 0.010737      |               | 0.447052      | 0.513727      |
| 3        | WT-Glut                                                                                                                                       | 0.091152      | 0.447052      |               | 0.197103      |
| 4        | TS-Glut                                                                                                                                       | 0.003869      | 0.513727      | 0.197103      |               |

|    | Fig4b- ATP Production -Data |                |
|----|-----------------------------|----------------|
|    | Genotype-Treatm             | Oxygen Consump |
| 1  | WT-Basal                    | 96.49          |
| 2  | WT-Basal                    | 52.7           |
| 3  | WT-Basal                    | 46.72          |
| 4  | WT-Basal                    | 56.7           |
| 5  | WT-Basal                    | 48.11          |
| 6  | WT-Basal                    | 117.41         |
| 7  | WT-Basal                    | 56.05          |
| 8  | WT-Basal                    | 37.99          |
| 9  | WT-Basal                    | 36.7           |
| 10 | WT-Basal                    | 47.97          |
| 11 | TS-Basal                    | 181.05         |
| 12 | TS-Basal                    | 163.09         |
| 13 | TS-Basal                    | 172.63         |
| 14 | TS-Basal                    | 66.81          |
| 15 | TS-Basal                    | 96.48          |
| 16 | TS-Basal                    | 75.92          |
| 17 | TS-Basal                    | 76.23          |
| 18 | TS-Basal                    | 112.3          |
| 19 | TS-Basal                    | 91.99          |
| 20 | TS-Basal                    | 76.96          |
| 21 | TS-Basal                    | 56.78          |
| 22 | TS-Basal                    | 45.96          |
| 23 | TS-Basal                    | 72.98          |
| 24 | WT-Glut                     | 90.95          |
| 25 | WT-Glut                     | 60.81          |
| 26 | WT-Glut                     | 157.08         |
| 27 | WT-Glut                     | 129.19         |
| 28 | WT-Glut                     | 76.8           |
| 29 | WT-Glut                     | 45.31          |
| 30 | WT-Glut                     | 65.6           |
| 31 | WT-Glut                     | 36.18          |
| 32 | WT-Glut                     | 58.83          |
| 33 | TS-Glut                     | 152.94         |
| 34 | TS-Glut                     | 78.48          |
| 35 | TS-Glut                     | 122.86         |
| 36 | TS-Glut                     | 184.45         |
| 37 | TS-Glut                     | 94.85          |
| 38 | TS-Glut                     | 90.05          |
| 39 | TS-Glut                     | 88.3           |
| 40 | TS-Glut                     | 62.04          |
| 41 | TS-Glut                     | 80.63          |

| Effect          | Univariate Tests of Significance for Oxygen Consump (Stats dez_2021-Fig4b-ATP-Production)<br>Sigma-restricted parameterization Effective hypothesis decomposition |                  |          |          |          |
|-----------------|-------------------------------------------------------------------------------------------------------------------------------------------------------------------|------------------|----------|----------|----------|
|                 | SS                                                                                                                                                                | Degr. of Freedom | MS       | F        | p        |
| Intercept       | 298202.6                                                                                                                                                          | 1                | 298202.6 | 197.5879 | 0.000000 |
| Genotype-Treatm | 13088.0                                                                                                                                                           | 3                | 4362.7   | 2.8907   | 0.048269 |

|       |         |    |        |  |
|-------|---------|----|--------|--|
| Error | 55840.9 | 37 | 1509.2 |  |
|-------|---------|----|--------|--|

| Cell No. | LSD test; variable Oxygen Consump (Stats dez_2021-Fig4b-ATP-Production) Probabilities for Post Hoc Tests Error: Between MS = 1509.2, df = 37.000 |               |               |               |               |
|----------|--------------------------------------------------------------------------------------------------------------------------------------------------|---------------|---------------|---------------|---------------|
|          | Genotype-Treatm                                                                                                                                  | {1}<br>59.684 | {2}<br>99.168 | {3}<br>80.083 | {4}<br>106.07 |
| 1        | WT-Basal                                                                                                                                         |               | 0.020730      | 0.260447      | 0.013366      |
| 2        | TS-Basal                                                                                                                                         | 0.020730      |               | 0.264553      | 0.684509      |
| 3        | WT-Glut                                                                                                                                          | 0.260447      | 0.264553      |               | 0.164322      |
| 4        | TS-Glut                                                                                                                                          | 0.013366      | 0.684509      | 0.164322      |               |

|    | Fig4b- MaxOCR -Data |                |
|----|---------------------|----------------|
|    | Genotype-Treatm     | Oxygen Consump |
| 1  | WT-Basal            | 258.46         |
| 2  | WT-Basal            | 135.76         |
| 3  | WT-Basal            | 126.78         |
| 4  | WT-Basal            | 147.8          |
| 5  | WT-Basal            | 128.75         |
| 6  | WT-Basal            | 250.09         |
| 7  | WT-Basal            | 132.37         |
| 8  | WT-Basal            | 99.1           |
| 9  | WT-Basal            | 84.63          |
| 10 | WT-Basal            | 152.11         |
| 11 | TS-Basal            | 385.1          |
| 12 | TS-Basal            | 511.76         |
| 13 | TS-Basal            | 454.36         |
| 14 | TS-Basal            | 212.95         |
| 15 | TS-Basal            | 304.73         |
| 16 | TS-Basal            | 245.71         |
| 17 | TS-Basal            | 241.06         |
| 18 | TS-Basal            | 229.57         |
| 19 | TS-Basal            | 199.91         |
| 20 | TS-Basal            | 128.88         |
| 21 | TS-Basal            | 165.28         |
| 22 | TS-Basal            | 139.42         |
| 23 | TS-Basal            | 157.49         |
| 24 | WT-Glut             | 196.68         |
| 25 | WT-Glut             | 190.8          |
| 26 | WT-Glut             | 420.76         |
| 27 | WT-Glut             | 281.14         |
| 28 | WT-Glut             | 212.7          |
| 29 | WT-Glut             | 82.87          |
| 30 | WT-Glut             | 152.91         |
| 31 | WT-Glut             | 96.17          |
| 32 | WT-Glut             | 132.92         |
| 33 | TS-Glut             | 317.27         |
| 34 | TS-Glut             | 211.34         |

|    |         |        |
|----|---------|--------|
| 35 | TS-Glut | 379.85 |
| 36 | TS-Glut | 483.5  |
| 37 | TS-Glut | 345.9  |
| 38 | TS-Glut | 246.45 |
| 39 | TS-Glut | 221.47 |
| 40 | TS-Glut | 167.22 |
| 41 | TS-Glut | 248.93 |

| Effect          | Univariate Tests of Significance for Oxygen Consump (Stats dez_2021-Fig4b-MaxOCR)<br>Sigma-restricted parameterization Effective hypothesis decomposition |                  |         |          |          |
|-----------------|-----------------------------------------------------------------------------------------------------------------------------------------------------------|------------------|---------|----------|----------|
|                 | SS                                                                                                                                                        | Degr. of Freedom | MS      | F        | p        |
| Intercept       | 2024593                                                                                                                                                   | 1                | 2024593 | 200.8041 | 0.000000 |
| Genotype-Treatm | 116473                                                                                                                                                    | 3                | 38824   | 3.8507   | 0.017058 |
| Error           | 373050                                                                                                                                                    | 37               | 10082   |          |          |

| Cell No. | LSD test; variable Oxygen Consump (Stats dez_2021-Fig4b-MaxOCR) Probabilities for Post Hoc Tests Error: Between MS = 10082., df = 37.000 |               |               |               |               |
|----------|------------------------------------------------------------------------------------------------------------------------------------------|---------------|---------------|---------------|---------------|
|          | Genotype-Treatm                                                                                                                          | {1}<br>151.59 | {2}<br>259.71 | {3}<br>196.33 | {4}<br>291.33 |
| 1        | WT-Basal                                                                                                                                 |               | 0.014683      | 0.338441      | 0.004457      |
| 2        | TS-Basal                                                                                                                                 | 0.014683      |               | 0.153919      | 0.472332      |
| 3        | WT-Glut                                                                                                                                  | 0.338441      | 0.153919      |               | 0.052103      |
| 4        | TS-Glut                                                                                                                                  | 0.004457      | 0.472332      | 0.052103      |               |

|    | Fig4b- Spare Capacity -Data |                |
|----|-----------------------------|----------------|
|    | Genotype-Treatm             | Oxygen Consump |
| 1  | WT-Basal                    | 142.54         |
| 2  | WT-Basal                    | 72.41          |
| 3  | WT-Basal                    | 66.31          |
| 4  | WT-Basal                    | 73.63          |
| 5  | WT-Basal                    | 66.37          |
| 6  | WT-Basal                    | 117.84         |
| 7  | WT-Basal                    | 59.49          |
| 8  | WT-Basal                    | 43.87          |
| 9  | WT-Basal                    | 36.83          |
| 10 | WT-Basal                    | 87.37          |
| 11 | TS-Basal                    | 171.16         |
| 12 | TS-Basal                    | 314.46         |
| 13 | TS-Basal                    | 243.87         |
| 14 | TS-Basal                    | 130.77         |
| 15 | TS-Basal                    | 184.16         |
| 16 | TS-Basal                    | 146.04         |
| 17 | TS-Basal                    | 145.35         |

|    |          |        |
|----|----------|--------|
| 18 | TS-Basal | 96.13  |
| 19 | TS-Basal | 88.46  |
| 20 | TS-Basal | 30.21  |
| 21 | TS-Basal | 93.95  |
| 22 | TS-Basal | 80.22  |
| 23 | TS-Basal | 65.68  |
| 24 | WT-Glut  | 89.23  |
| 25 | WT-Glut  | 111.66 |
| 26 | WT-Glut  | 224.84 |
| 27 | WT-Glut  | 123.61 |
| 28 | WT-Glut  | 115.26 |
| 29 | WT-Glut  | 26.17  |
| 30 | WT-Glut  | 69.54  |
| 31 | WT-Glut  | 44.45  |
| 32 | WT-Glut  | 56.24  |
| 33 | TS-Glut  | 137.28 |
| 34 | TS-Glut  | 114.42 |
| 35 | TS-Glut  | 228.92 |
| 36 | TS-Glut  | 261.71 |
| 37 | TS-Glut  | 224.92 |
| 38 | TS-Glut  | 133.38 |
| 39 | TS-Glut  | 106.33 |
| 40 | TS-Glut  | 89.77  |
| 41 | TS-Glut  | 148.02 |

| Effect          | Univariate Tests of Significance for Oxygen Consump (Stats dez_2021-Fig4b-Spare-Capacity)<br>Sigma-restricted parameterization Effective hypothesis decomposition |                  |          |          |          |
|-----------------|-------------------------------------------------------------------------------------------------------------------------------------------------------------------|------------------|----------|----------|----------|
|                 | SS                                                                                                                                                                | Degr. of Freedom | MS       | F        | p        |
| Intercept       | 554818.5                                                                                                                                                          | 1                | 554818.5 | 146.8061 | 0.000000 |
| Genotype-Treatm | 42895.8                                                                                                                                                           | 3                | 14298.6  | 3.7834   | 0.018323 |
| Error           | 139832.6                                                                                                                                                          | 37               | 3779.3   |          |          |

| Cell No. | LSD test; variable Oxygen Consump (Stats dez_2021-Fig4b-Spare-Capacity) Probabilities for Post Hoc Tests Error: Between MS = 3779.3, df = 37.000 |               |               |               |               |
|----------|--------------------------------------------------------------------------------------------------------------------------------------------------|---------------|---------------|---------------|---------------|
|          | Genotype-Treatm                                                                                                                                  | {1}<br>76.666 | {2}<br>137.73 | {3}<br>95.667 | {4}<br>160.53 |
| 1        | WT-Basal                                                                                                                                         |               | 0.023581      | 0.505329      | 0.005218      |
| 2        | TS-Basal                                                                                                                                         | 0.023581      |               | 0.123119      | 0.397894      |
| 3        | WT-Glut                                                                                                                                          | 0.505329      | 0.123119      |               | 0.031315      |
| 4        | TS-Glut                                                                                                                                          | 0.005218      | 0.397894      | 0.031315      |               |

|    | Fig4b- Coupling Efficiency -Data |                |
|----|----------------------------------|----------------|
|    | Genotype-Treatm                  | Oxygen Consump |
| 1  | WT-Basal                         | 83.23          |
| 2  | WT-Basal                         | 83.18          |
| 3  | WT-Basal                         | 77.24          |
| 4  | WT-Basal                         | 76.33          |
| 5  | WT-Basal                         | 77.12          |
| 6  | WT-Basal                         | 88.82          |
| 7  | WT-Basal                         | 76.9           |
| 8  | WT-Basal                         | 68.77          |
| 9  | WT-Basal                         | 76.93          |
| 10 | WT-Basal                         | 74.1           |
| 11 | TS-Basal                         | 84.64          |
| 12 | TS-Basal                         | 82.56          |
| 13 | TS-Basal                         | 82.01          |
| 14 | TS-Basal                         | 81.3           |
| 15 | TS-Basal                         | 80.04          |
| 16 | TS-Basal                         | 76.17          |
| 17 | TS-Basal                         | 79.64          |
| 18 | TS-Basal                         | 84.15          |
| 19 | TS-Basal                         | 82.39          |
| 20 | TS-Basal                         | 77.99          |
| 21 | TS-Basal                         | 79.62          |
| 22 | TS-Basal                         | 77.67          |
| 23 | TS-Basal                         | 79.49          |
| 24 | WT-Glut                          | 84.64          |
| 25 | WT-Glut                          | 76.87          |
| 26 | WT-Glut                          | 80.15          |
| 27 | WT-Glut                          | 82.02          |
| 28 | WT-Glut                          | 78.83          |
| 29 | WT-Glut                          | 79.9           |
| 30 | WT-Glut                          | 78.7           |
| 31 | WT-Glut                          | 69.9           |
| 32 | WT-Glut                          | 76.73          |
| 33 | TS-Glut                          | 85.26          |
| 34 | TS-Glut                          | 80.96          |
| 35 | TS-Glut                          | 81.4           |
| 36 | TS-Glut                          | 83.16          |
| 37 | TS-Glut                          | 78.42          |
| 38 | TS-Glut                          | 79.62          |
| 39 | TS-Glut                          | 76.68          |
| 40 | TS-Glut                          | 80.11          |
| 41 | TS-Glut                          | 79.92          |

| Effect          | Univariate Tests of Significance for Oxygen Consump (Stats dez_2021-Fig4b-Coupling-Efficiency) Sigma-restricted parameterization Effective hypothesis decomposition |                  |          |          |          |
|-----------------|---------------------------------------------------------------------------------------------------------------------------------------------------------------------|------------------|----------|----------|----------|
|                 | SS                                                                                                                                                                  | Degr. of Freedom | MS       | F        | p        |
| Intercept       | 253517.4                                                                                                                                                            | 1                | 253517.4 | 17380.77 | 0.000000 |
| Genotype-Treatm | 48.2                                                                                                                                                                | 3                | 16.1     | 1.10     | 0.360419 |

|       |       |    |      |  |
|-------|-------|----|------|--|
| Error | 539.7 | 37 | 14.6 |  |
|-------|-------|----|------|--|

**Figure 4d (RM ANOVA)**

| Fig4d- Basal and oligomycin ECAR in Astrocytes treated with Glutamate -Data |                 |       |            |
|-----------------------------------------------------------------------------|-----------------|-------|------------|
|                                                                             | Genotype-Treatm | Basal | Oligomycin |
| 1                                                                           | WT-Basal        | 68.27 | 98.14      |
| 2                                                                           | WT-Basal        | 21.90 | 37.36      |
| 3                                                                           | WT-Basal        | 22.73 | 51.94      |
| 4                                                                           | WT-Basal        | 22.15 | 38.62      |
| 5                                                                           | WT-Basal        | 33.64 | 54.42      |
| 6                                                                           | WT-Basal        | 27.49 | 56.74      |
| 7                                                                           | WT-Basal        | 27.30 | 58.32      |
| 8                                                                           | WT-Basal        | 30.04 | 54.28      |
| 9                                                                           | WT-Basal        | 23.27 | 46.68      |
| 10                                                                          | WT-Basal        | 18.35 | 44.54      |
| 11                                                                          | Ts65Dn-Basal    | 25.98 | 54.75      |
| 12                                                                          | Ts65Dn-Basal    | 96.15 | 165.41     |
| 13                                                                          | Ts65Dn-Basal    | 72.04 | 120.71     |
| 14                                                                          | Ts65Dn-Basal    | 65.46 | 108.13     |
| 15                                                                          | Ts65Dn-Basal    | 36.08 | 69.08      |
| 16                                                                          | Ts65Dn-Basal    | 29.09 | 60.95      |
| 17                                                                          | Ts65Dn-Basal    | 30.15 | 56.00      |
| 18                                                                          | Ts65Dn-Basal    | 18.07 | 37.02      |
| 19                                                                          | Ts65Dn-Basal    | 37.00 | 70.28      |
| 20                                                                          | Ts65Dn-Basal    | 30.92 | 62.04      |
| 21                                                                          | Ts65Dn-Basal    | 28.21 | 66.35      |
| 22                                                                          | Ts65Dn-Basal    | 28.71 | 62.99      |
| 23                                                                          | Ts65Dn-Basal    | 25.49 | 63.93      |
| 24                                                                          | WT-Glut         | 29.62 | 52.90      |
| 25                                                                          | WT-Glut         | 40.51 | 81.16      |
| 26                                                                          | WT-Glut         | 42.50 | 78.55      |
| 27                                                                          | WT-Glut         | 26.59 | 54.55      |
| 28                                                                          | WT-Glut         | 22.36 | 41.62      |
| 29                                                                          | WT-Glut         | 16.92 | 46.10      |
| 30                                                                          | WT-Glut         | 20.81 | 37.12      |
| 31                                                                          | WT-Glut         | 30.26 | 52.21      |
| 32                                                                          | WT-Glut         | 54.86 | 91.79      |
| 33                                                                          | Ts65Dn-Glut     | 23.86 | 48.36      |
| 34                                                                          | Ts65Dn-Glut     | 51.87 | 93.58      |
| 35                                                                          | Ts65Dn-Glut     | 59.92 | 100.72     |
| 36                                                                          | Ts65Dn-Glut     | 26.52 | 61.60      |
| 37                                                                          | Ts65Dn-Glut     | 26.30 | 55.86      |
| 38                                                                          | Ts65Dn-Glut     | 36.34 | 54.51      |
| 39                                                                          | Ts65Dn-Glut     | 16.20 | 38.84      |
| 40                                                                          | Ts65Dn-Glut     | 66.71 | 114.79     |
| 41                                                                          | Ts65Dn-Glut     | 28.49 | 50.25      |



|                            |                                                                                                                                                          | Repeated Measures Analysis of Variance (Stats dez_2021-acc-Glut-Oligomycin)<br>Sigma-restricted parameterization Effective hypothesis decomposition |                   |               |               |               |               |               |               |               |              |
|----------------------------|----------------------------------------------------------------------------------------------------------------------------------------------------------|-----------------------------------------------------------------------------------------------------------------------------------------------------|-------------------|---------------|---------------|---------------|---------------|---------------|---------------|---------------|--------------|
| Effect                     |                                                                                                                                                          | SS                                                                                                                                                  | Degr. of Freedom  |               | MS            |               | F             |               | p             |               |              |
| Intercept                  |                                                                                                                                                          | 198285.6                                                                                                                                            | 1                 |               | 198285.6      |               | 204.6393      |               | 0.000000      |               |              |
| Genotype-Glut              |                                                                                                                                                          | 3725.5                                                                                                                                              | 3                 |               | 1241.8        |               | 1.2816        |               | 0.294956      |               |              |
| Error                      |                                                                                                                                                          | 35851.2                                                                                                                                             | 37                |               | 969.0         |               |               |               |               |               |              |
| Treatment                  |                                                                                                                                                          | 18156.8                                                                                                                                             | 1                 |               | 18156.8       |               | 376.8680      |               | 0.000000      |               |              |
| Treament*Genotype<br>-Glut |                                                                                                                                                          | 439.8                                                                                                                                               | 3                 |               | 146.6         |               | 3.0430        |               | 0.040815      |               |              |
| Error                      |                                                                                                                                                          | 1782.6                                                                                                                                              | 37                |               | 48.2          |               |               |               |               |               |              |
| Cell<br>No.                | LSD test; variable DV_1 (Stats dez_2021-acc-Glut-Oligomycin) Probabilities for Post<br>Hoc Tests Error: Between; Within; Pooled MS = 508.56, df = 40.670 |                                                                                                                                                     |                   |               |               |               |               |               |               |               |              |
|                            | Genotype-<br>Glut                                                                                                                                        | Treatment                                                                                                                                           | {1}<br>29.51<br>4 | {2}<br>54.104 | {3}<br>40.258 | {4}<br>76.742 | {5}<br>31.603 | {6}<br>59.556 | {7}<br>37.357 | {8}<br>68.723 |              |
|                            | 1                                                                                                                                                        | WT-no-Glut                                                                                                                                          | Basal             |               | 0.0000<br>00  | 0.2640<br>03  | 0.0000<br>12  | 0.8412<br>03  | 0.0060<br>04  | 0.4534<br>76  | 0.0004<br>98 |
|                            | 2                                                                                                                                                        | WT-no-Glut                                                                                                                                          | Oligomycin        | 0.0000<br>000 |               | 0.1520<br>50  | 0.0217<br>46  | 0.0357<br>79  | 0.6016<br>57  | 0.1137<br>65  | 0.1658<br>75 |
|                            | 3                                                                                                                                                        | Ts65Dn-no-<br>Glut                                                                                                                                  | Basal             | 0.264<br>003  | 0.1520<br>50  |               | 0.0000<br>00  | 0.3813<br>59  | 0.0552<br>70  | 0.7682<br>35  | 0.0058<br>23 |
|                            | 4                                                                                                                                                        | Ts65Dn-no-<br>Glut                                                                                                                                  | Oligomycin        | 0.0000<br>012 | 0.0217<br>46  | 0.0000<br>00  |               | 0.0000<br>39  | 0.0863<br>67  | 0.0002<br>40  | 0.4170<br>26 |
|                            | 5                                                                                                                                                        | WT-Glut                                                                                                                                             | Basal             | 0.841<br>203  | 0.0357<br>79  | 0.3813<br>59  | 0.0000<br>39  |               | 0.0000<br>00  | 0.5913<br>27  | 0.0011<br>71 |
|                            | 6                                                                                                                                                        | WT-Glut                                                                                                                                             | Oligomycin        | 0.006<br>004  | 0.6016<br>57  | 0.0552<br>70  | 0.0863<br>67  | 0.0000<br>00  |               | 0.0430<br>87  | 0.3935<br>37 |
|                            | 7                                                                                                                                                        | Ts65Dn-<br>Glut                                                                                                                                     | Basal             | 0.453<br>476  | 0.1137<br>65  | 0.7682<br>35  | 0.0002<br>40  | 0.5913<br>27  | 0.0430<br>87  |               | 0.0000<br>00 |
|                            | 8                                                                                                                                                        | Ts65Dn-<br>Glut                                                                                                                                     | Oligomycin        | 0.0000<br>498 | 0.1658<br>75  | 0.0058<br>23  | 0.4170<br>26  | 0.0011<br>71  | 0.3935<br>37  | 0.0000<br>00  |              |

**Figure 4e (RM ANOVA)**

| Fig4e- glycolytic capacity in Astrocytes treated with Glutamate -Data |                 |                |
|-----------------------------------------------------------------------|-----------------|----------------|
|                                                                       | Genotype-Treatm | Oxygen Consump |
| 1                                                                     | WT-Basal        | 29.87          |
| 2                                                                     | WT-Basal        | 15.46          |
| 3                                                                     | WT-Basal        | 29.21          |
| 4                                                                     | WT-Basal        | 16.47          |
| 5                                                                     | WT-Basal        | 20.78          |
| 6                                                                     | WT-Basal        | 29.24          |
| 7                                                                     | WT-Basal        | 31.02          |
| 8                                                                     | WT-Basal        | 24.24          |
| 9                                                                     | WT-Basal        | 23.4           |
| 10                                                                    | WT-Basal        | 26.19          |
| 11                                                                    | TS-Basal        | 28.76          |
| 12                                                                    | TS-Basal        | 69.27          |

|    |          |       |
|----|----------|-------|
| 13 | TS-Basal | 48.67 |
| 14 | TS-Basal | 42.67 |
| 15 | TS-Basal | 33.01 |
| 16 | TS-Basal | 31.86 |
| 17 | TS-Basal | 25.85 |
| 18 | TS-Basal | 18.96 |
| 19 | TS-Basal | 33.28 |
| 20 | TS-Basal | 31.11 |
| 21 | TS-Basal | 38.13 |
| 22 | TS-Basal | 34.27 |
| 23 | TS-Basal | 38.44 |
| 24 | WT-Glut  | 23.28 |
| 25 | WT-Glut  | 40.65 |
| 26 | WT-Glut  | 36.05 |
| 27 | WT-Glut  | 27.97 |
| 28 | WT-Glut  | 19.26 |
| 29 | WT-Glut  | 29.18 |
| 30 | WT-Glut  | 16.31 |
| 31 | WT-Glut  | 21.95 |
| 32 | WT-Glut  | 36.93 |
| 33 | TS-Glut  | 24.5  |
| 34 | TS-Glut  | 41.71 |
| 35 | TS-Glut  | 40.8  |
| 36 | TS-Glut  | 35.08 |
| 37 | TS-Glut  | 29.57 |
| 38 | TS-Glut  | 18.17 |
| 39 | TS-Glut  | 22.64 |
| 40 | TS-Glut  | 48.08 |
| 41 | TS-Glut  | 21.75 |

| Effect          | Univariate Tests of Significance for Oxygen Consump (Stats dez_2021-Fig4e- glycolytic capacity) Sigma-restricted parameterization Effective hypothesis decomposition |                  |          |          |          |
|-----------------|----------------------------------------------------------------------------------------------------------------------------------------------------------------------|------------------|----------|----------|----------|
|                 | SS                                                                                                                                                                   | Degr. of Freedom | MS       | F        | p        |
| Intercept       | 36312.62                                                                                                                                                             | 1                | 36312.62 | 376.7947 | 0.000000 |
| Genotype-Treatm | 879.71                                                                                                                                                               | 3                | 293.24   | 3.0427   | 0.040827 |
| Error           | 3565.78                                                                                                                                                              | 37               | 96.37    |          |          |

| Cell No. | LSD test; variable Oxygen Consump (Stats dez_2021-Fig4e-- glycolytic capacity) Probabilities for Post Hoc Tests Error: Between MS = 96.372, df = 37.000 |               |               |               |               |
|----------|---------------------------------------------------------------------------------------------------------------------------------------------------------|---------------|---------------|---------------|---------------|
|          | Genotype-Treatm                                                                                                                                         | {1}<br>24.588 | {2}<br>36.483 | {3}<br>27.953 | {4}<br>31.367 |
| 1        | WT-Basal                                                                                                                                                |               | 0.006565      | 0.460322      | 0.141369      |
| 2        | TS-Basal                                                                                                                                                | 0.006565      |               | 0.052461      | 0.237036      |
| 3        | WT-Glut                                                                                                                                                 | 0.460322      | 0.052461      |               | 0.465422      |
| 4        | TS-Glut                                                                                                                                                 | 0.141369      | 0.237036      | 0.465422      |               |

**Figure 4f (One-way ANOVA)**

| Fig4f- glycolytic reserve in Astrocytes treated with Glutamate -Data |                 |                |
|----------------------------------------------------------------------|-----------------|----------------|
|                                                                      | Genotype-Treatm | Oxygen Consump |
| 1                                                                    | WT-Basal        | 0.4375275      |
| 2                                                                    | WT-Basal        | 0.7059361      |
| 3                                                                    | WT-Basal        | 1.285086       |
| 4                                                                    | WT-Basal        | 0.7435666      |
| 5                                                                    | WT-Basal        | 0.6177717      |
| 6                                                                    | WT-Basal        | 1.06366        |
| 7                                                                    | WT-Basal        | 1.136264       |
| 8                                                                    | WT-Basal        | 0.8069241      |
| 9                                                                    | WT-Basal        | 1.005587       |
| 10                                                                   | WT-Basal        | 1.427248       |
| 11                                                                   | TS-Basal        | 1.107005       |
| 12                                                                   | TS-Basal        | 0.7204368      |
| 13                                                                   | TS-Basal        | 0.6755969      |
| 14                                                                   | TS-Basal        | 0.6518484      |
| 15                                                                   | TS-Basal        | 0.9149113      |
| 16                                                                   | TS-Basal        | 1.095222       |
| 17                                                                   | TS-Basal        | 0.8573798      |
| 18                                                                   | TS-Basal        | 1.049253       |
| 19                                                                   | TS-Basal        | 0.8994595      |
| 20                                                                   | TS-Basal        | 1.006145       |
| 21                                                                   | TS-Basal        | 1.351648       |
| 22                                                                   | TS-Basal        | 1.193661       |
| 23                                                                   | TS-Basal        | 1.508042       |
| 24                                                                   | WT-Glut         | 0.9756916      |
| 25                                                                   | WT-Glut         | 0.78369        |
| 26                                                                   | WT-Glut         | 0.6016355      |
| 27                                                                   | WT-Glut         | 1.054676       |
| 28                                                                   | WT-Glut         | 0.7323194      |
| 29                                                                   | WT-Glut         | 0.802972       |
| 30                                                                   | WT-Glut         | 1.00679        |
| 31                                                                   | WT-Glut         | 0.3290361      |
| 32                                                                   | WT-Glut         | 1.296244       |
| 33                                                                   | TS-Glut         | 1.026823       |
| 34                                                                   | TS-Glut         | 0.8041257      |
| 35                                                                   | TS-Glut         | 0.6809079      |
| 36                                                                   | TS-Glut         | 1.322775       |
| 37                                                                   | TS-Glut         | 1.124335       |
| 38                                                                   | TS-Glut         | 0.5            |
| 39                                                                   | TS-Glut         | 1.397531       |
| 40                                                                   | TS-Glut         | 0.7207315      |
| 41                                                                   | TS-Glut         | 0.7634258      |

| Effect | Univariate Tests of Significance for Oxygen Consump (Stats dez_ 2021-Fig4e-glycolytic reserve) Sigma-restricted parameterization Effective hypothesis decomposition |                  |    |   |   |
|--------|---------------------------------------------------------------------------------------------------------------------------------------------------------------------|------------------|----|---|---|
|        | SS                                                                                                                                                                  | Degr. of Freedom | MS | F | p |

|                 |          |    |          |          |          |
|-----------------|----------|----|----------|----------|----------|
| Intercept       | 34.19838 | 1  | 34.19838 | 414.5550 | 0.000000 |
| Genotype-Treatm | 0.13739  | 3  | 0.04580  | 0.5551   | 0.647944 |
| Error           | 3.05228  | 37 | 0.08249  |          |          |

**Figure 4g (One-way ANOVA)**

|    | Fig4g- OCR/ECAR ratio in Astrocytes treated with Glutamate -Data |                |
|----|------------------------------------------------------------------|----------------|
|    | Genotype-Treatm                                                  | Oxygen Consump |
| 1  | WT-Basal                                                         | 1.69811        |
| 2  | WT-Basal                                                         | 2.892694       |
| 3  | WT-Basal                                                         | 2.660361       |
| 4  | WT-Basal                                                         | 3.348533       |
| 5  | WT-Basal                                                         | 1.85434        |
| 6  | WT-Basal                                                         | 4.810476       |
| 7  | WT-Basal                                                         | 2.711355       |
| 8  | WT-Basal                                                         | 1.819241       |
| 9  | WT-Basal                                                         | 2.022776       |
| 10 | WT-Basal                                                         | 3.572207       |
| 11 | TS-Basal                                                         | 8.234796       |
| 12 | TS-Basal                                                         | 2.051898       |
| 13 | TS-Basal                                                         | 2.921849       |
| 14 | TS-Basal                                                         | 1.255423       |
| 15 | TS-Basal                                                         | 3.341741       |
| 16 | TS-Basal                                                         | 3.426263       |
| 17 | TS-Basal                                                         | 3.174461       |
| 18 | TS-Basal                                                         | 7.384615       |
| 19 | TS-Basal                                                         | 3.012162       |
| 20 | TS-Basal                                                         | 3.272639       |
| 21 | TS-Basal                                                         | 2.599433       |
| 22 | TS-Basal                                                         | 2.09474        |
| 23 | TS-Basal                                                         | 3.640251       |
| 24 | WT-Glut                                                          | 3.488265       |
| 25 | WT-Glut                                                          | 1.473106       |
| 26 | WT-Glut                                                          | 3.199099       |
| 27 | WT-Glut                                                          | 5.755279       |
| 28 | WT-Glut                                                          | 2.98327        |
| 29 | WT-Glut                                                          | 1.20721        |
| 30 | WT-Glut                                                          | 3.874691       |
| 31 | WT-Glut                                                          | 0.7195323      |
| 32 | WT-Glut                                                          | 2.572833       |
| 33 | TS-Glut                                                          | 6.906538       |
| 34 | TS-Glut                                                          | 1.44785        |
| 35 | TS-Glut                                                          | 2.303071       |
| 36 | TS-Glut                                                          | 7.728884       |
| 37 | TS-Glut                                                          | 3.875285       |
| 38 | TS-Glut                                                          | 2.426802       |
| 39 | TS-Glut                                                          | 6.246296       |
| 40 | TS-Glut                                                          | 0.9102083      |
| 41 | TS-Glut                                                          | 3.181116       |

| Effect          | Univariate Tests of Significance for Oxygen Consump (Stats dez_2021-Fig4g- OCR/ECAR ratio) Sigma-restricted parameterization Effective hypothesis decomposition |                  |          |          |          |
|-----------------|-----------------------------------------------------------------------------------------------------------------------------------------------------------------|------------------|----------|----------|----------|
|                 | SS                                                                                                                                                              | Degr. of Freedom | MS       | F        | p        |
| Intercept       | 423.9883                                                                                                                                                        | 1                | 423.9883 | 125.1160 | 0.000000 |
| Genotype-Treatm | 9.3890                                                                                                                                                          | 3                | 3.1297   | 0.9235   | 0.438991 |
| Error           | 125.3842                                                                                                                                                        | 37               | 3.3888   |          |          |

**Figure 5 (RM-ANOVA done with Statistica)**

|    | Genotype | 150      | 300      | 450      | 600      | 750      | 900      | 1050     |
|----|----------|----------|----------|----------|----------|----------|----------|----------|
| 1  | Ct       | 97.61759 | 96.4434  | 95.46321 | 92.81193 | 94.2618  | 97.86264 | 89.0273  |
| 2  | Ct       | 97.92319 | 92.12501 | 94.00805 | 98.74298 | 98.93675 | 96.51711 | 62.19009 |
| 3  | Ct       | 102.0518 | 100.2863 | 108.3347 | 110.36   | 98.0807  | 100.2227 | 20.25343 |
| 4  | Ct       | 124.4006 | 117.3762 | 111.9468 | 93.66219 | 60.64223 | 64.01183 | 41.71332 |
| 5  | Ct       | 116.8843 | 116.7801 | 128.2759 | 115.8582 | 42.46049 | 35.28863 | 25.48288 |
| 6  | Ct       | 102.9437 | 104.1087 | 107.266  | 108.0544 | 101.8641 | 72.84272 | 33.46408 |
| 7  | Ct       | 117.9979 | 118.1127 | 115.4091 | 117.9184 | 96.65135 | 102.2177 | 35.54515 |
| 8  | Ct       | 101.4795 | 93.75957 | 97.19947 | 93.0568  | 96.68164 | 82.17702 |          |
| 9  | Ct       | 103.2431 | 109.286  | 98.28512 | 98.67009 | 104.1181 | 65.71395 |          |
| 10 | Ct       | 81.26357 | 85.24964 | 82.858   | 83.46807 | 85.45924 | 79.92739 |          |
| 11 | Ct       | 101.2239 | 103.1144 | 104.046  | 102.9741 | 98.20698 | 83.36387 |          |
| 12 | Ct       | 94.71782 | 98.74387 | 95.9489  | 99.61708 | 99.1089  | 80.29202 |          |
| 13 | Ts       | 93.73476 | 89.94145 | 88.20133 | 86.31485 | 89.25842 | 79.6227  | 26.27256 |
| 14 | Ts       | 94.52034 | 90.4986  | 94.50504 | 99.43749 | 96.89664 | 84.45644 | 32.93537 |
| 15 | Ts       | 121.0847 | 115.8083 | 118.7408 | 112.1085 | 89.96216 | 93.53584 | 31.91087 |
| 16 | Ts       | 105.8081 | 111.1565 | 113.0098 | 111.3973 | 107.3258 | 108.88   | 24.44363 |
| 17 | Ts       | 105.8703 | 110.0295 | 104.8542 | 106.6442 | 85.95346 | 91.07613 | 55.48068 |
| 18 | Ts       | 96.36415 | 91.83051 | 97.57475 | 106.5892 | 101.0806 | 75.49155 | 35.39568 |
| 19 | Ts       | 102.8017 | 99.82188 | 105.6419 | 108.6218 | 105.5745 | 93.94888 |          |

| Effect             | Repeated Measures Analysis of Variance (Cytotoxicity) Sigma-restricted parameterization Effective hypothesis decomposition |                  |          |          |          |
|--------------------|----------------------------------------------------------------------------------------------------------------------------|------------------|----------|----------|----------|
|                    | SS                                                                                                                         | Degr. of Freedom | MS       | F        | p        |
| Intercept          | 742413.3                                                                                                                   | 1                | 742413.3 | 2465.543 | 0.000000 |
| Genotype           | 42.7                                                                                                                       | 1                | 42.7     | 0.142    | 0.713520 |
| Error              | 3312.3                                                                                                                     | 11               | 301.1    |          |          |
| H2O2-Conc          | 45324.9                                                                                                                    | 6                | 7554.2   | 35.196   | 0.000000 |
| H2O2-Conc*Genotype | 1084.9                                                                                                                     | 6                | 180.8    | 0.842    | 0.541783 |
| Error              | 14165.8                                                                                                                    | 66               | 214.6    |          |          |
